# Supplementary material
Source: PubMed Central journal article supplement (PMC3780328)
Supplement: Supp_Fig1.pdf [file Supp_Fig1.pdf]

## Supplementary Data

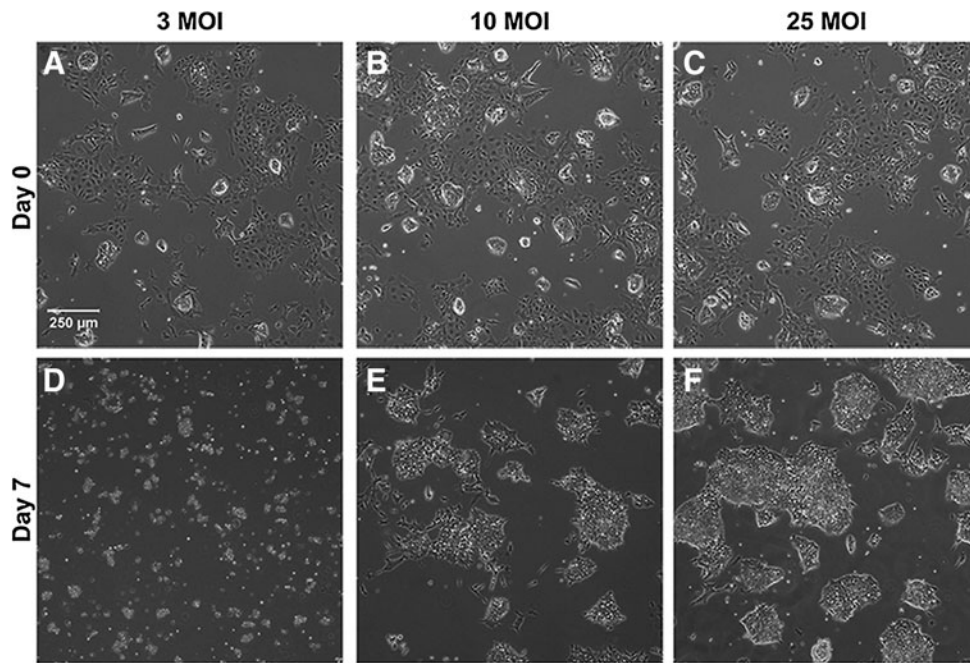

**SUPPLEMENTARY FIG. S1.** Embryonic stem cell (ESC) transduction. ESCs were incubated with lentiviral particles containing the luciferase T-cell factor/lymphoid enhancer-binding factor (TCF/LEF) reporter construct for 24 h at 3 (A), 10 (B), and 25 (C) Multiplicity of Infection (MOI). Selection with puromycin resulted in no transduced colonies from 3 MOI (D), but colonies from 10 MOI (E) and 25 MOI (F) remained after 1 week of puromycin treatment (3  $\mu\text{g}/\text{mL}$ ). Scale bar = 250  $\mu\text{m}$ .
