# Supplementary material
Source: PubMed Central journal article supplement (PMC3780328)
Supplement: Supp_Fig2.pdf [file Supp_Fig2.pdf]

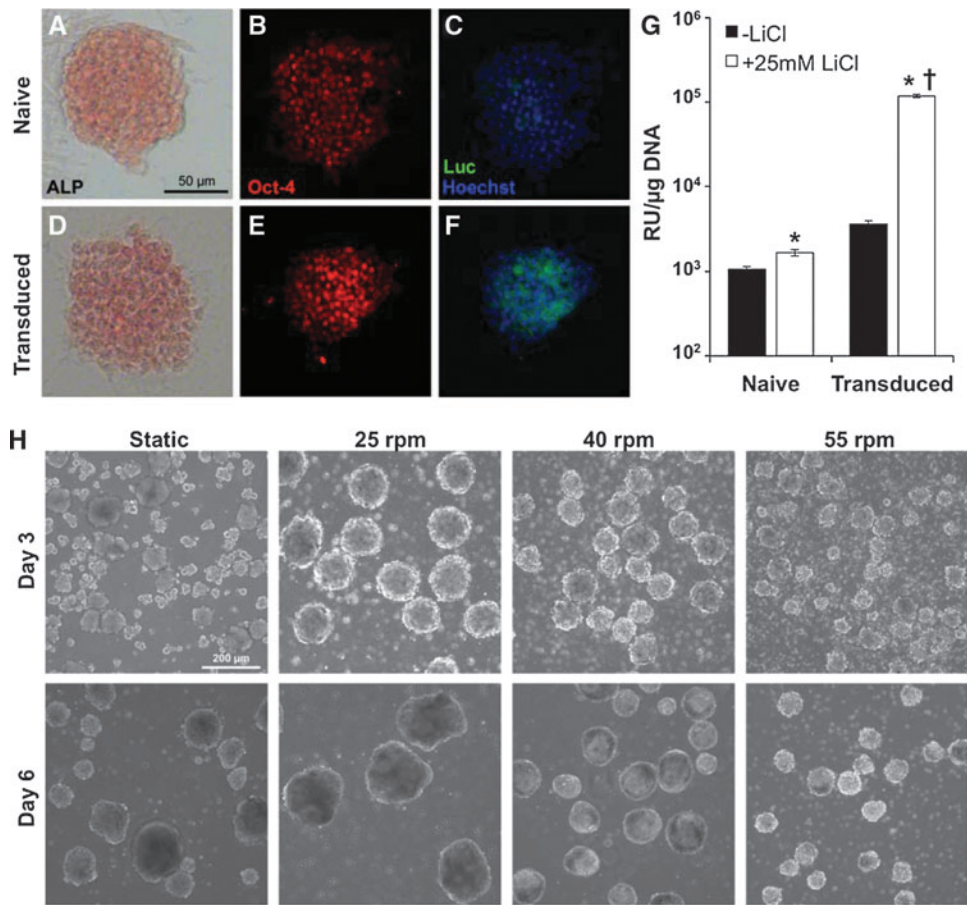

**SUPPLEMENTARY FIG. S2.** TCF/LEF activity and pluripotent phenotype of transduced ESCs. Naive and transduced mESCs expressed alkaline phosphatase (**A, D**) and Oct-4 (**B, E**); however, only transduced cells expressed luciferase (**C, F**). Transduced cells expressed a higher baseline level of luciferase activity compared with naïve cells and also exhibited increased activity on stimulation with LiCl (25 mM) (**G**). In addition, transduced ESCs were capable of formation and differentiation as embryoid bodies in rotary and static culture conditions (**H**). Scale bar = 50 μm.  $n = 3$ ,  $P < 0.05$ : \*compared to naïve ± LiCl, †compared to -LiCl.
