# Supplementary material
Source: PubMed Central journal article supplement (PMC3780328)
Supplement: Supp_Table1.pdf [file Supp_Table1.pdf]

SUPPLEMENTARY TABLE S1. PRIMER SEQUENCES AND ANNEALING TEMPERATURES

| <i>Gene</i>   | <i>Forward sequence</i>         | <i>Reverse sequence</i>         | <i>Temp.</i> |
|---------------|---------------------------------|---------------------------------|--------------|
| <i>Wnt 11</i> | AGG GTG AGG ACA GAC GTC TTG AAA | TGG CTG TGC TGT AAG AAT GTC CCT | 57.9°C       |
| <i>Wnt3a</i>  | GTC TTC TGC CTG GAA CTT TGC GTT | TGT CTA AAT CCA GTG GTG GGT GGA | 57.0°C       |
| <i>Dkk1</i>   | GCG GCA GCT GTC CGG TTC TT      | GAG AAC TCC CGG CGC CAC AC      | 58.0°C       |
| <i>B-T</i>    | GAC TCC AGC CTT CCT TCC         | CAC ACC ACT GAC GCA CAC         | 56.5°C       |
| <i>Mesp1</i>  | GAC CCA TCG TTC CTG TAC         | CTG AAG AGC GGA GAT GAG         | 56.5°C       |
| <i>Mef2c</i>  | CCC AAT CTT CTG CCA CTG         | GGT TGC CGT ATC CAT TCC         | 57.0°C       |
| <i>Nkx2.5</i> | ATG CCC TGT CCC TCA GAT TTC ACA | AAG TGG GAT GGA TCG GAG AAA GGT | 60.5°C       |
| <i>α-MHC</i>  | GGT CCA CAT TCT TCA GGA TTC TC  | GCG TTC CTT CTC TGA CTT TCG     | 58.0°C       |
| <i>MLC-2v</i> | GAC CAT TCT CAA CGC ATT CAA G   | CTT CTC CGT GGG TAA TGA TGT G   | 56.5°C       |
